# Supplementary material for: Alteration in angiotensin-converting enzyme 2 by PM1 during the development of emphysema in rats
Source: PubMed Central journal article supplement — ERJ Open Res. 2020 Oct 5;6(4):00174-2020. doi: 10.1183/23120541.00174-2020 (PMC7533376; doi:10.1183/23120541.00174-2020), 2020-10-05
Supplement: 00174-2020.figureS1.pdf [file 00174-2020.figureS1.pdf]

# Supplementary Information

## Alteration in angiotensin-converting enzyme 2 by PM<sub>1</sub> during the development of emphysema in rats

Hsiao-Chi Chuang<sup>1,2,3\*</sup> (PhD), Yi-Ying Chen<sup>1</sup> (MSc), Ta-Chih Hsiao<sup>4</sup> (PhD), Hsiu-Chu Chou<sup>5</sup> (PhD), Han-Pin Kuo<sup>6</sup> (MD, PhD), Po-Hao Feng<sup>3,6</sup> (MD, PhD), Shu-Chuan Ho<sup>1</sup> (PhD), Jen-Kun Chen<sup>7</sup> (PhD), Kai-Jen Chuang<sup>8,9</sup> (PhD), Kang-Yun Lee<sup>3,6\*</sup> (MD, PhD)

<sup>1</sup>School of Respiratory Therapy, College of Medicine, Taipei Medical University, Taipei, Taiwan

<sup>2</sup>Cell Physiology and Molecular Image Research Center, Wan Fang Hospital, Taipei Medical University, Taipei, Taiwan

<sup>3</sup>Division of Pulmonary Medicine, Department of Internal Medicine, Shuang Ho Hospital, Taipei Medical University, New Taipei City, Taiwan

<sup>4</sup>Graduate Institute of Environmental Engineering, National Taiwan University, Taipei, Taiwan

<sup>5</sup>Department of Anatomy and Cell Biology, School of Medicine, College of Medicine, Taipei Medical University, Taipei, Taiwan

<sup>6</sup>Division of Pulmonary Medicine, Department of Internal Medicine, School of Medicine, College of Medicine, Taipei Medical University, Taipei, Taiwan

<sup>7</sup>Institute of Biomedical Engineering & Nanomedicine, National Health Research Institutes, Miaoli, Taiwan

<sup>8</sup>School of Public Health, College of Public Health, Taipei Medical University, Taipei, Taiwan

<sup>9</sup>Department of Public Health, School of Medicine, College of Medicine, Taipei Medical University, Taipei, Taiwan

### \* Corresponding Authors

*Hsiao-Chi Chuang, PhD*

Taiwan CardioPulmonary Research (T-CPR) Group, School of Respiratory Therapy, College of Medicine, Taipei Medical University, 250 Wuxing Street, Taipei 11031, Taiwan.

Telephone: +886-2-27361661 ext. 3512. Fax: +886-2-27391143. E-mail: [r92841005@ntu.edu.tw](mailto:r92841005@ntu.edu.tw)

*Kang-Yun Lee, MD, PhD*

Division of Pulmonary Medicine, Department of Internal Medicine, Shuang Ho Hospital, Taipei Medical University, 291 Zhongzheng Rd., Zhonghe District, New Taipei City 23561, Taiwan.

Telephone: +886-2-22490088. Fax: +886-2-27391143. E-mail: [kangyunlee68@gmail.com](mailto:kangyunlee68@gmail.com)

## Supplementary Information

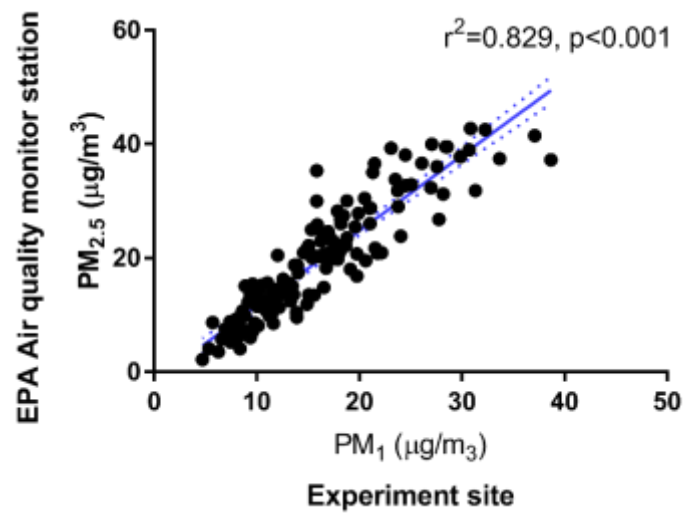

**Figure S1.** Correlation between PM<sub>1</sub> exposure to rats and ambient PM<sub>2.5</sub>
